# Supplementary material for: The Enhancement of Astaxanthin Production Using Medium Cultures Components, Stressors, Nanoparticles, Elicitors, and Gene Engineering in Haematococcus pluvialis
Source: Preprints.org preprint supplement (doi:10.20944/preprints202302.0063.v1), 2023-02-03
Supplement: Supplementary file 1 [file supplementary]

Dear Editor

I wish to submit a review manuscript entitled “**The enhancement of Astaxanthin production using medium cultures, stressors, Nanoparticles, elicitors, and gene engineering in *Haematococcus pluvialis*”** for consideration by **Journal of priprint.** In this study, the researches about **medium cultures**, **stressors, Nanoparticles, and gene engineering** on the production of astaxanthin and other things in different microalgae especially *Haematococcus pluvialis* were collected. We confirm that this review paper is original and has not been published elsewhere nor is it currently under consideration for publication elsewhere.

Please address all correspondence concerning this manuscript to me at Garshasb2010@gmail.com

Sincerely,

Hamid Garshasbi
